# Supplementary material for: Trabectedin Is Active against Two Novel, Patient-Derived Solitary Fibrous Pleural Tumor Cell Lines and Synergizes with Ponatinib
Source: Cancers (Basel). 2022 Nov 15;14(22):5602. doi: 10.3390/cancers14225602 (PMC9688590; doi:10.3390/cancers14225602)
Supplement: Supplementary file 1 [file cancers-14-05602-s001.zip › cancers-1936901-supplementary.pdf]

### Supplementary Material

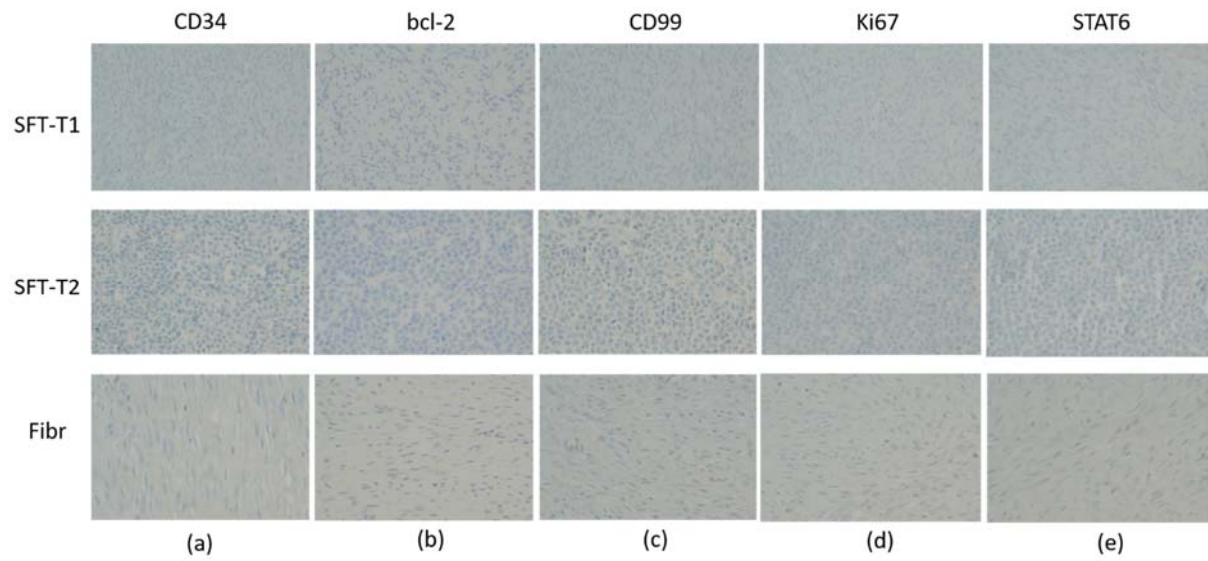

**Figure S1.** Representative (immune-) histological pictures of negative control stainings with isotypes corresponding to the antibodies (a) CD34, (b) bcl-2, (c) CD99, (d) Ki67, (e) STAT6 of the two included tumors (SFT-T1 and SFT-T2) and an excluded fibromatosis patient (Fibr) compare Figure 2 of the main text.

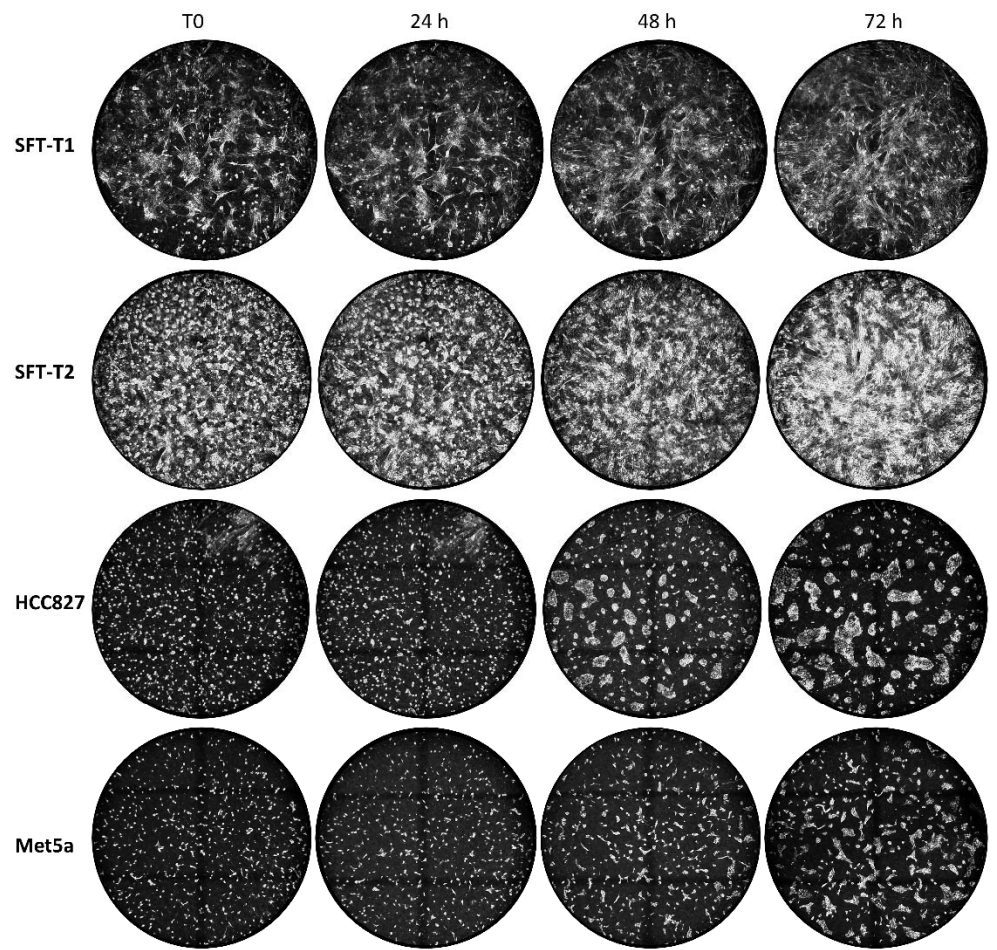

(a)

cell proliferation

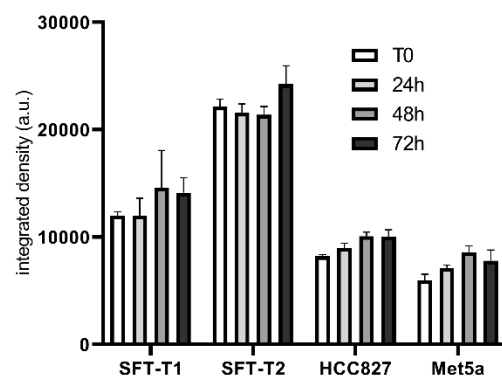

(b)

**Figure S2.** SFT-T1, SFT-T2, HCC827, and Met5a cells show stable *in vitro* growth. (a) Representative digital phase contrast images of respective cell lines after T0, 24, 48, and 72 h. (b) Quantification of pixel intensities of images shown in (a); n=3.

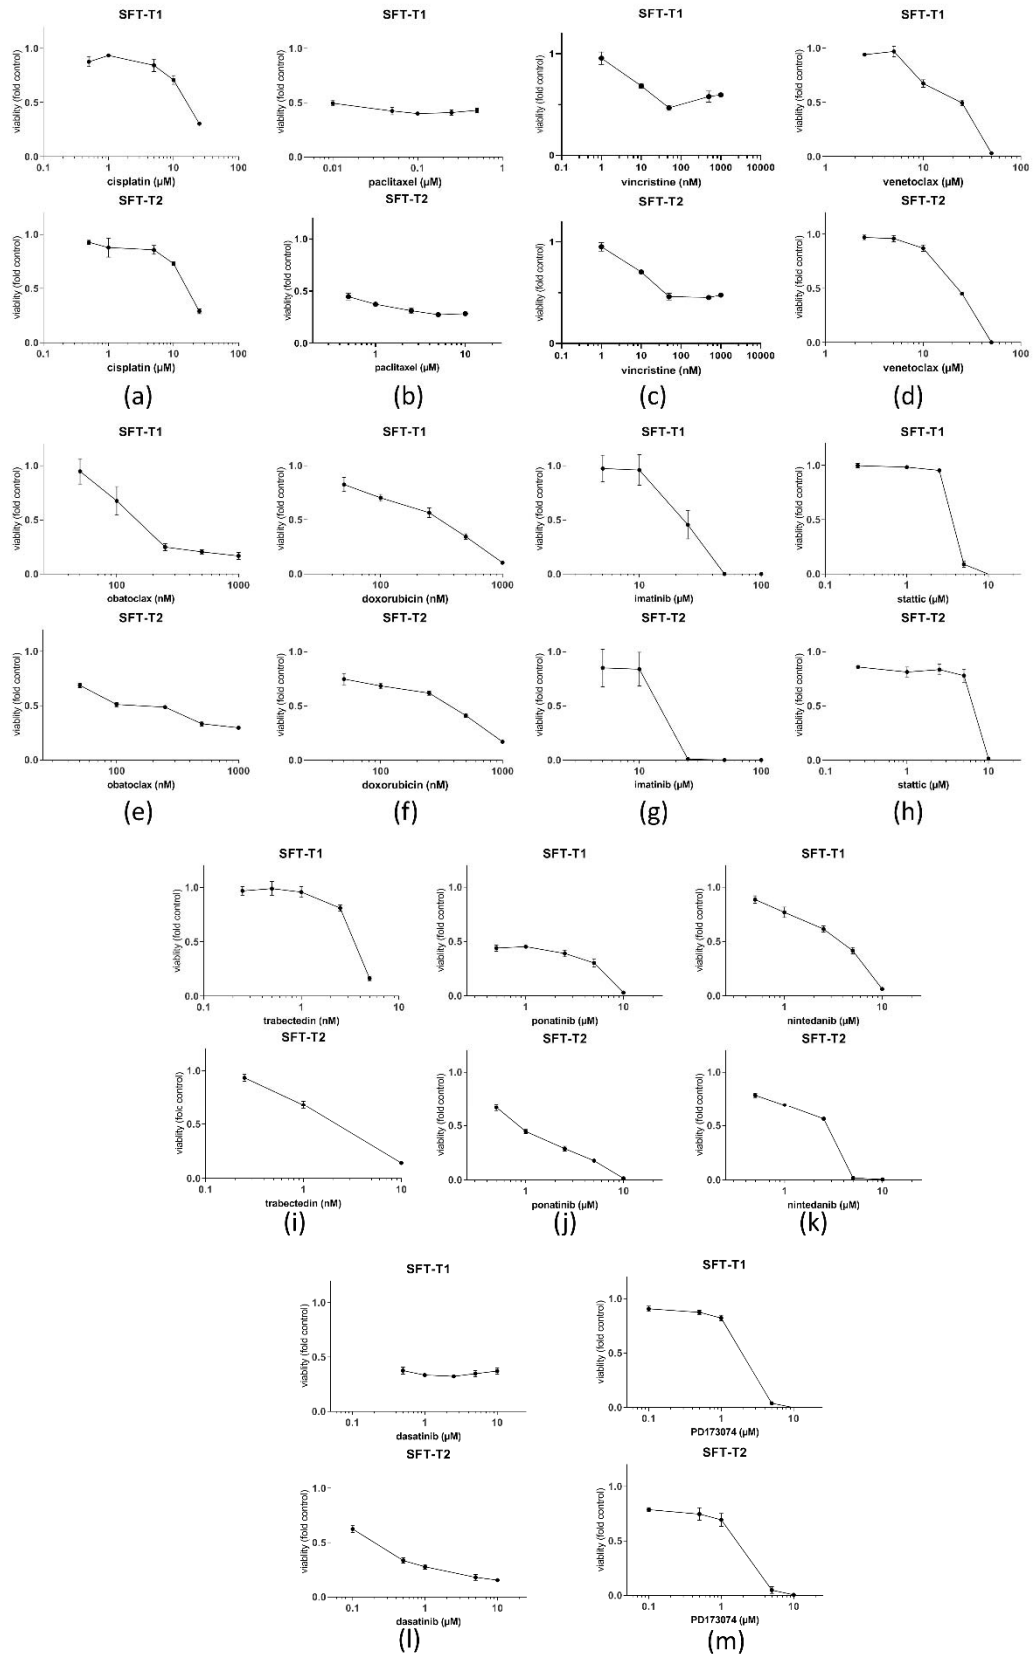

**Figure S3.** Representative *in vitro* dose-response curves of SFT-T1 (upper) and SFT-T2 (lower) cells after 72 h exposure to (a) cisplatin, (b) paclitaxel, (c) vincristine, (d) venetoclax, (e) obatoclox, (f) doxorubicin, (g) imatinib, (h) stattic, (i) trabectedin, (j) ponatinib, (k) nintedanib, (l) dasatinib, and (m) PD173074 determined by MTT assay.

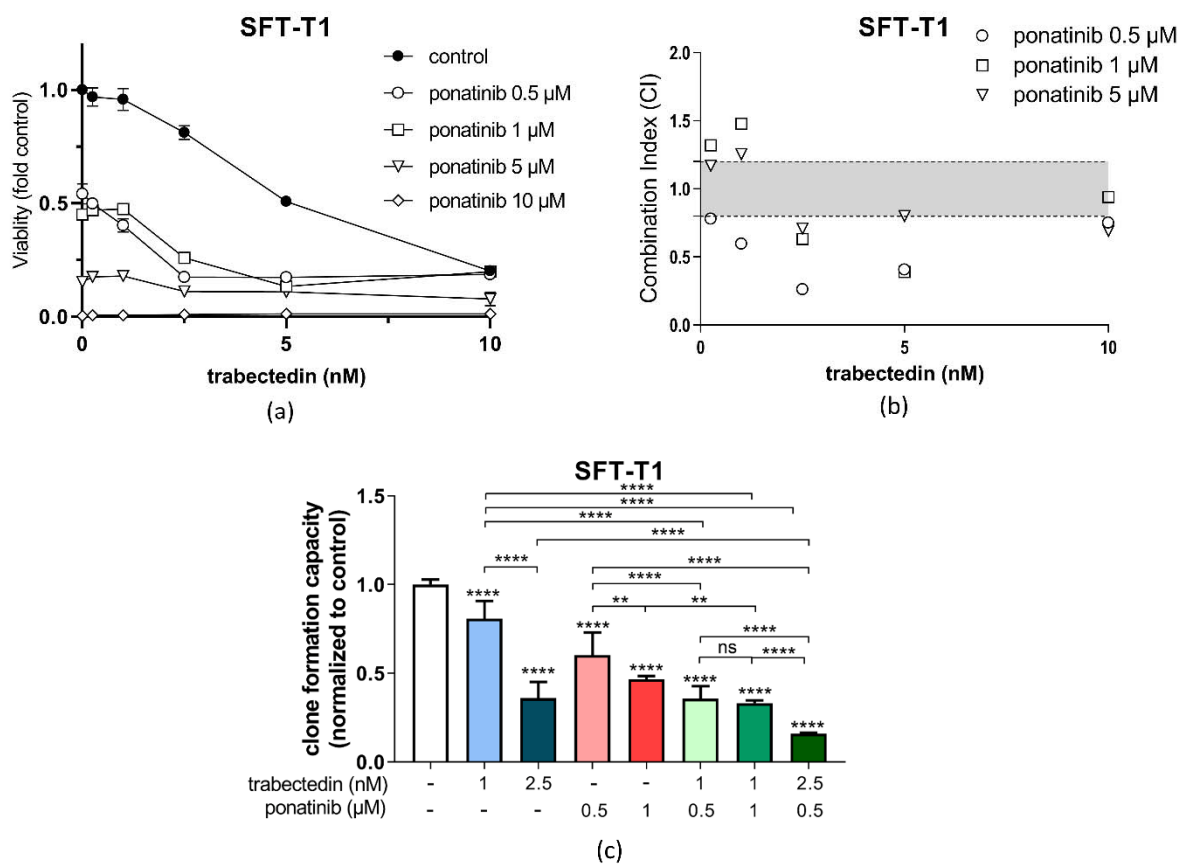

**Figure S4.** Ponatinib and trabectedin are active against low risk group SFT-T1 cell growth and synergize *in vitro*. **(a)** Combination of ponatinib with trabectedin shows synergistic anticancer activity. **(b)** Corresponding CI values. CI < 0.9, synergism; CI = 0.9-1.2, additive effects; or CI > 1.2 antagonism. **(c)** Quantification of effects of ponatinib and trabectedin as single agents and in combination on SFT-T1 clone formation capacity over a treatment period of nine days.

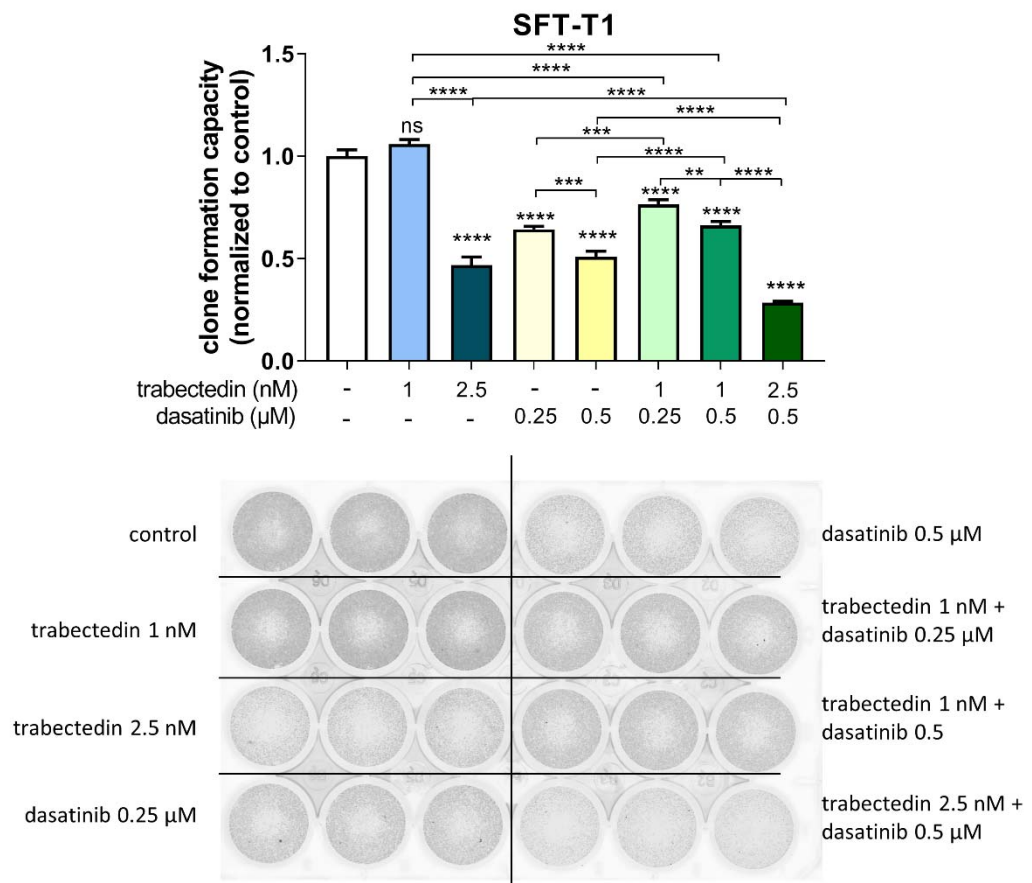

**Figure S5.** Dasatinib is active against SFT-T1 growth *in vitro* and enhances the anticancer activity of trabectedin. Effects of trabectedin as well as dasatinib as single agents and in combination on SFT clone formation capacity over a treatment period of nine days.

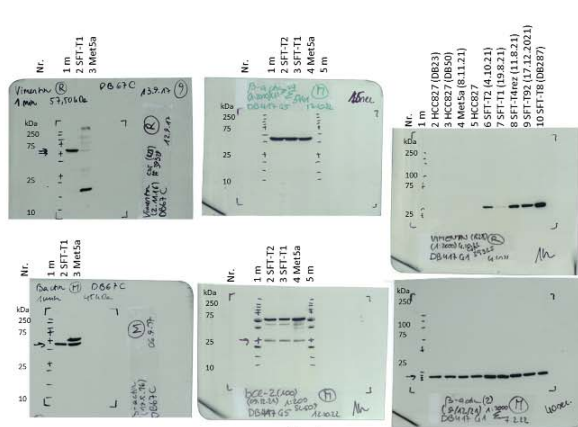

(a)

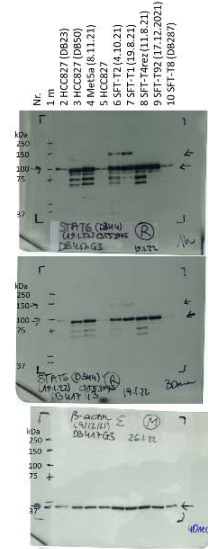

(b)

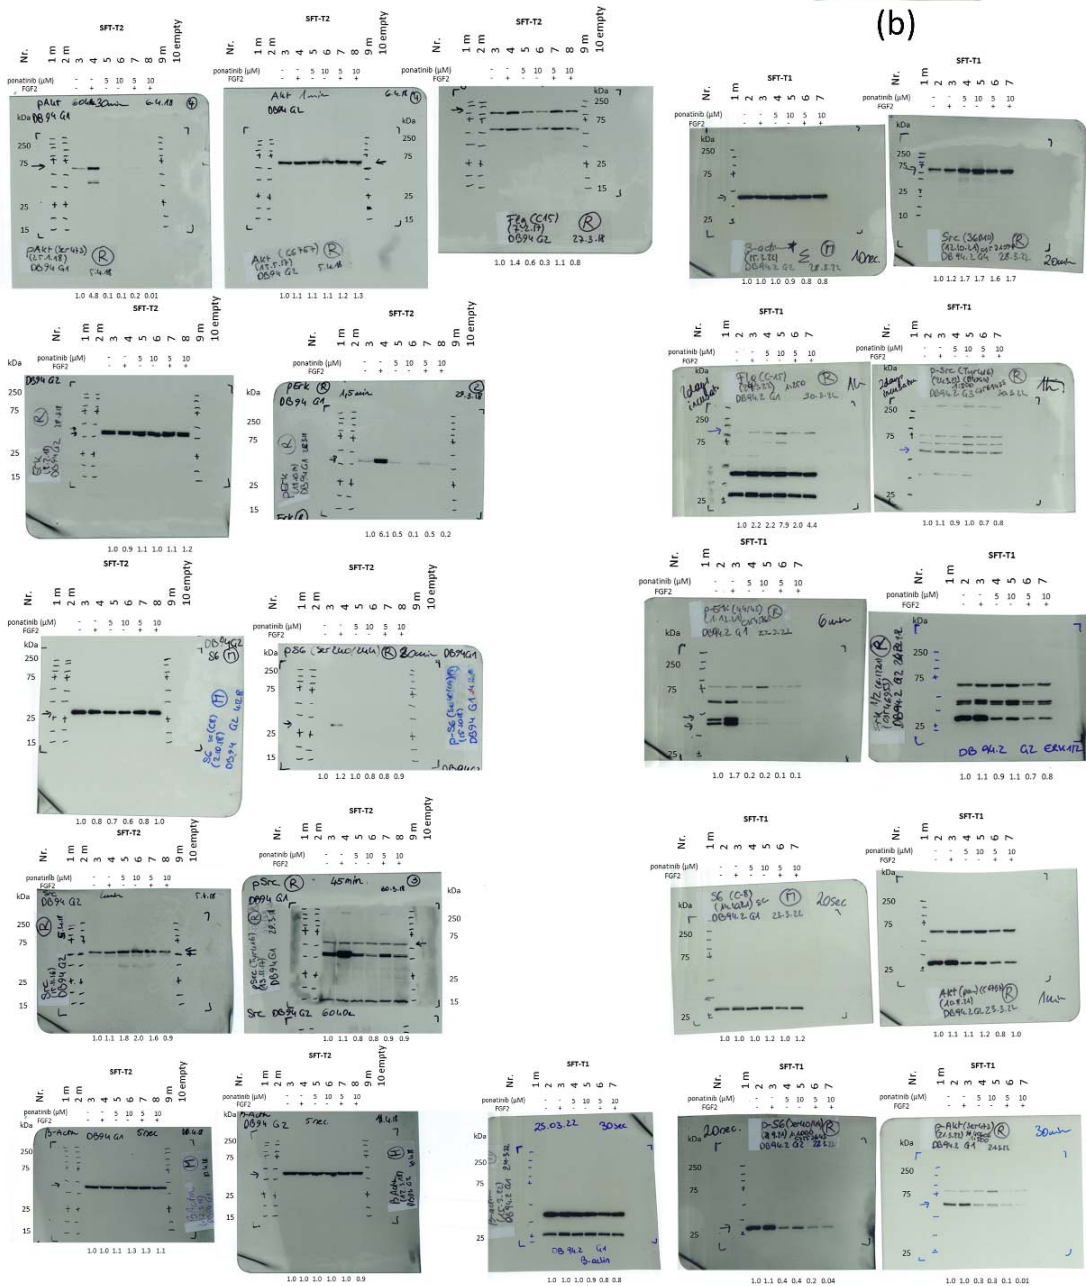

(c)

**Figure S6.** Original Western blots of (a) Figure 3b, (b) Figure 3d, and (c) Figure 6.
